# Supplementary material
Source: PubMed Central journal article supplement (PMC6945120)
Supplement: NIHMS1061976-supplement-3.pdf [file NIHMS1061976-supplement-3.pdf]

### Supplementary Table 3

#### Antibodies used in the study

| Name                           | Company                  | Cat. No.  | Purpose           |
|--------------------------------|--------------------------|-----------|-------------------|
| CD24-PE/Cy7                    | BioLegend                | 311120    | Flow cytometry    |
| CD44-APC                       | BD Biosciences           | 559942    | Flow cytometry    |
| H-2Kd-PE                       | BD Biosciences           | 553566    | Flow cytometry    |
| $\beta$ -actin                 | Santa Cruz               | sc-69879  | Western blot      |
| ERK1/2 MAPK                    | Cell Signaling           | 4696      | Western blot      |
| Phospho-ERK1/2 MAPK            | Cell Signaling           | 9101      | Western blot      |
| p38 MAPK                       | Cell Signaling           | 8690      | Western blot      |
| Phospho-p38 MAPK               | Cell Signaling           | 4511      | Western blot      |
| Non-phospho $\beta$ -catenin   | Cell Signaling           | 8814      | Western blot      |
| LRP8                           | Abcam                    | ab108208  | Western blot      |
| CK19                           | Abcam                    | ab7754    | Western blot, IHC |
| Vinculin                       | Cell Signaling           | 13901     | Western blot      |
| CD24-phycoerythrin             | BD Biosciences           | 555428    | IF                |
| CD44-BV510                     | BioLegend                | 103043    | IF                |
| CK8/18                         | Abcam                    | ab194130  | IF                |
| goat anti-guinea pig IgG DL755 | Thermo Fisher Scientific | SA5-10099 | IF                |
| goat anti-mouse IgM AF488      | Thermo Fisher Scientific | A-21042   | IF                |
| goat anti-rabbit IgM AF647     | Thermo Fisher Scientific | A-21245   | IF                |
| LRP8                           | Abcam                    | ab204112  | IF                |
| Vimentin                       | Thermo Fisher Scientific | MA1-10459 | IF                |
